# Supplementary material
Source: HighWire-hosted journal article supplement (https://www.cmajopen.ca/highwire/filestream/85468/field_highwire_adjunct_files/6/2020-0128-7-at.pdf)
Supplement: 2020-0128-7-at.pdf [file 2020-0128-7-at.pdf]

## CONCEPTT Cost Implications

### S7. Group mean costs of individual healthcare resources by province and study group

| Service                                                                                                                                                                                    | Province         | CGM Group<br>N=100<br>Women/Infants |                       | SMBG<br>N=102<br>Women/Infants |                       | Difference<br>Between<br>CGM and<br>SMBG<br>Mean<br>Total<br>Costs <sup>1</sup> | Rank of Cost<br>Driver<br>Within<br>Province <sup>2</sup> |
|--------------------------------------------------------------------------------------------------------------------------------------------------------------------------------------------|------------------|-------------------------------------|-----------------------|--------------------------------|-----------------------|---------------------------------------------------------------------------------|-----------------------------------------------------------|
|                                                                                                                                                                                            |                  | Mean<br>Cost Per<br>Group           | Standard<br>Deviation | Mean<br>Cost Per<br>Group      | Standard<br>Deviation |                                                                                 |                                                           |
| 1. Number of "unscheduled" contacts (via phone, patient visits/appointments, email, text, etc) with the nurse, doctor, any research staff, or the CGM helpline since the last study visit: | Ontario          | \$237.67                            | \$219.69              | \$137.53                       | \$104.57              | \$100.14                                                                        | 15                                                        |
|                                                                                                                                                                                            | British Columbia | \$225.91                            | \$208.79              | \$130.73                       | \$99.40               | \$95.17                                                                         | 15                                                        |
|                                                                                                                                                                                            | Alberta          | \$249.24                            | \$230.37              | \$144.22                       | \$109.65              | \$105.02                                                                        | 15                                                        |
| 1a. For diabetes management - Number of times                                                                                                                                              | Ontario          | \$112.76                            | \$105.78              | \$112.38                       | \$98.00               | \$0.38                                                                          | 30                                                        |
|                                                                                                                                                                                            | British Columbia | \$107.19                            | \$100.56              | \$106.83                       | \$93.16               | \$0.36                                                                          | 30                                                        |
|                                                                                                                                                                                            | Alberta          | \$118.24                            | \$110.93              | \$117.85                       | \$102.77              | \$0.40                                                                          | 30                                                        |
| 1b. For CGM device - Number of times                                                                                                                                                       | Ontario          | \$28.19                             | \$37.59               | \$1.05                         | \$4.48                | \$27.14                                                                         | 23                                                        |
|                                                                                                                                                                                            | British Columbia | \$26.80                             | \$35.73               | \$1.00                         | \$4.26                | \$25.80                                                                         | 23                                                        |
|                                                                                                                                                                                            | Alberta          | \$29.56                             | \$39.42               | \$1.10                         | \$4.70                | \$28.46                                                                         | 23                                                        |
| 1c. For both diabetes management and CGM device questions - Number of times                                                                                                                | Ontario          | \$71.88                             | \$144.70              | \$6.55                         | \$19.69               | \$65.33                                                                         | 18                                                        |
|                                                                                                                                                                                            | British Columbia | \$68.30                             | \$137.50              | \$6.22                         | \$18.71               | \$62.08                                                                         | 18                                                        |
|                                                                                                                                                                                            | Alberta          | \$75.37                             | \$151.74              | \$6.87                         | \$20.65               | \$68.51                                                                         | 18                                                        |
| 1d. Other (reason not specified) - Number of times                                                                                                                                         | Ontario          | \$24.85                             | \$47.70               | \$17.55                        | \$29.90               | \$7.30                                                                          | 25                                                        |
|                                                                                                                                                                                            | British Columbia | \$23.62                             | \$45.34               | \$16.68                        | \$28.43               | \$6.94                                                                          | 25                                                        |
|                                                                                                                                                                                            | Alberta          | \$26.06                             | \$50.02               | \$18.41                        | \$31.36               | \$7.65                                                                          | 25                                                        |
| 2.a. Maternal antenatal hospital length of stay not for delivery: a. LOS=>24h physician fees and ward cost                                                                                 | Ontario          | \$438.53                            | \$1,044.30            | \$334.71                       | \$863.93              | \$103.82                                                                        | 14                                                        |
|                                                                                                                                                                                            | British Columbia | \$431.98                            | \$1,023.77            | \$330.02                       | \$848.74              | \$101.96                                                                        | 14                                                        |
|                                                                                                                                                                                            | Alberta          | \$429.38                            | \$1,019.52            | \$328.00                       | \$844.68              | \$101.38                                                                        | 14                                                        |
|                                                                                                                                                                                            | Ontario          | \$23.45                             | \$91.44               | \$20.44                        | \$70.40               | \$3.01                                                                          | 28                                                        |

## CONCEPTT Cost Implications

| Service                                                                                                             | Province         | CGM Group<br>N=100<br>Women/Infants |                       | SMBG<br>N=102<br>Women/Infants |                       | Difference<br>Between<br>CGM and<br>SMBG<br>Mean<br>Total<br>Costs <sup>1</sup> | Rank of Cost<br>Driver<br>Within<br>Province <sup>2</sup> |
|---------------------------------------------------------------------------------------------------------------------|------------------|-------------------------------------|-----------------------|--------------------------------|-----------------------|---------------------------------------------------------------------------------|-----------------------------------------------------------|
|                                                                                                                     |                  | Mean<br>Cost Per<br>Group           | Standard<br>Deviation | Mean<br>Cost Per<br>Group      | Standard<br>Deviation |                                                                                 |                                                           |
| 2.b. Maternal antenatal hospital length of stay not for delivery: b. LOS<24h (ODU, 6h) physician fees and ward cost | British Columbia | \$20.89                             | \$81.44               | \$18.20                        | \$62.71               | \$2.69                                                                          | 28                                                        |
|                                                                                                                     | Alberta          | \$21.25                             | \$82.86               | \$18.52                        | \$63.80               | \$2.73                                                                          | 28                                                        |
| 3. Pregnancy termination ≥ 20 weeks physician fees                                                                  | Ontario          | \$0.00                              | \$0.00                | \$3.04                         | \$30.70               | -\$3.04                                                                         | 27                                                        |
|                                                                                                                     | British Columbia | \$0.00                              | \$0.00                | \$3.96                         | \$40.02               | -\$3.96                                                                         | 27                                                        |
|                                                                                                                     | Alberta          | \$0.00                              | \$0.00                | \$4.38                         | \$44.24               | -\$4.38                                                                         | 27                                                        |
| 4. Stillbirth physician fees                                                                                        | Ontario          | \$0.00                              | \$0.00                | \$9.19                         | \$92.81               | -\$9.19                                                                         | 24                                                        |
|                                                                                                                     | British Columbia | \$0.00                              | \$0.00                | \$8.18                         | \$82.65               | -\$8.18                                                                         | 24                                                        |
|                                                                                                                     | Alberta          | \$0.00                              | \$0.00                | \$6.77                         | \$68.39               | -\$6.77                                                                         | 24                                                        |
| 5. Induction                                                                                                        | Ontario          | \$33.20                             | \$34.04               | \$27.90                        | \$33.51               | \$5.30                                                                          | 26                                                        |
|                                                                                                                     | British Columbia | \$18.51                             | \$18.98               | \$15.55                        | \$18.68               | \$2.95                                                                          | 26                                                        |
|                                                                                                                     | Alberta          | \$58.90                             | \$60.40               | \$49.50                        | \$59.45               | \$9.40                                                                          | 26                                                        |
| 6. Spontaneous vaginal delivery                                                                                     | Ontario          | \$211.95                            | \$348.83              | \$140.56                       | \$310.72              | \$71.38                                                                         | 17                                                        |
|                                                                                                                     | British Columbia | \$172.10                            | \$277.88              | \$110.05                       | \$239.26              | \$62.05                                                                         | 17                                                        |
|                                                                                                                     | Alberta          | \$141.43                            | \$229.15              | \$91.38                        | \$199.24              | \$50.04                                                                         | 17                                                        |
| 7. Operative vaginal delivery                                                                                       | Ontario          | \$66.95                             | \$219.07              | \$64.32                        | \$226.68              | \$2.63                                                                          | 29                                                        |
|                                                                                                                     | British Columbia | \$71.68                             | \$229.29              | \$63.61                        | \$219.33              | \$8.07                                                                          | 29                                                        |
|                                                                                                                     | Alberta          | \$56.19                             | \$179.98              | \$51.33                        | \$177.36              | \$4.85                                                                          | 29                                                        |
| 8. Elective Caesarean delivery                                                                                      | Ontario          | \$502.71                            | \$684.97              | \$598.50                       | \$717.29              | -\$95.79                                                                        | 16                                                        |
|                                                                                                                     | British Columbia | \$642.70                            | \$859.58              | \$741.42                       | \$873.24              | -\$98.72                                                                        | 16                                                        |
|                                                                                                                     | Alberta          | \$477.89                            | \$633.14              | \$562.91                       | \$656.33              | -\$85.02                                                                        | 16                                                        |
| 9. Emergency Caesarean delivery                                                                                     | Ontario          | \$257.71                            | \$443.00              | \$288.84                       | \$458.35              | -\$31.13                                                                        | 22                                                        |
|                                                                                                                     | British Columbia | \$251.90                            | \$429.60              | \$283.72                       | \$445.81              | -\$31.82                                                                        | 22                                                        |
|                                                                                                                     | Alberta          | \$244.05                            | \$414.39              | \$278.15                       | \$435.54              | -\$34.10                                                                        | 22                                                        |
| 10. Antenatal ward duration                                                                                         | All Provinces    | \$719.96                            | \$1,332.18            | \$1,253.29                     | \$2,522.84            | -\$533.32                                                                       | 9 (Ontario),<br>9 (British Columbia),<br>9 (Alberta)      |

Appendix 7, as supplied by the authors. Appendix to: Ahmed RJ, Gafni A, Hutton EK, et al. The cost implications of continuous glucose monitoring in pregnant women with type 1 diabetes in 3 Canadian provinces: a posthoc cost analysis of the CONCEPTT trial. *CMAJ Open* 2021. DOI:10.9778/cmajo.20200128. Copyright © 2021 The Author(s) or their employer(s). To receive this resource in an accessible format, please contact us at [cmajgroup@cmaj.ca](mailto:cmajgroup@cmaj.ca).

## CONCEPTT Cost Implications

| Service                                                                                                                                           | Province         | CGM Group<br>N=100<br>Women/Infants |                       | SMBG<br>N=102<br>Women/Infants |                       | Difference<br>Between<br>CGM and<br>SMBG<br>Mean<br>Total<br>Costs <sup>1</sup> | Rank of Cost<br>Driver<br>Within<br>Province <sup>2</sup>     |
|---------------------------------------------------------------------------------------------------------------------------------------------------|------------------|-------------------------------------|-----------------------|--------------------------------|-----------------------|---------------------------------------------------------------------------------|---------------------------------------------------------------|
|                                                                                                                                                   |                  | Mean<br>Cost Per<br>Group           | Standard<br>Deviation | Mean<br>Cost Per<br>Group      | Standard<br>Deviation |                                                                                 |                                                               |
| 11. Labour and delivery ward duration (Including: Pre-eclampsia or hypertension symptoms at delivery for up to 24 hour L&D monitoring from birth) | All Provinces    | \$3,285.07                          | \$3,048.77            | \$4,082.51                     | \$4,554.21            | -\$797.44                                                                       | 8 (Ontario),<br>8 (British Columbia),<br>8 (Alberta)          |
| 12. Operating room ward duration                                                                                                                  | All Provinces    | \$928.78                            | \$589.67              | \$1,051.85                     | \$505.35              | -\$123.07                                                                       | 13 (Ontario),<br>13 (British Columbia),<br>13 (Alberta)       |
| 13. Postpartum ward duration and cost                                                                                                             | All Provinces    | \$2,463.09                          | \$2,205.01            | \$2,415.12                     | \$1,540.50            | \$47.96                                                                         | 19 (Ontario),<br>19 (British Columbia),<br>19 (Alberta)       |
| 14. NICU Level 2 physician care (days)                                                                                                            | Ontario          | \$131.41                            | \$329.46              | \$313.03                       | \$740.98              | -\$181.63                                                                       | 11                                                            |
|                                                                                                                                                   | British Columbia | \$195.43                            | \$466.80              | \$424.92                       | \$891.15              | -\$229.49                                                                       | 11                                                            |
|                                                                                                                                                   | Alberta          | \$204.69                            | \$550.51              | \$524.49                       | \$1,335.86            | -\$319.80                                                                       | 11                                                            |
| 15. NICU Level 3 physician care (days)                                                                                                            | Ontario          | \$234.44                            | \$706.14              | \$368.43                       | \$1,046.11            | -\$134.00                                                                       | 12                                                            |
|                                                                                                                                                   | British Columbia | \$317.22                            | \$936.27              | \$473.09                       | \$1,297.11            | -\$155.87                                                                       | 12                                                            |
|                                                                                                                                                   | Alberta          | \$279.12                            | \$848.69              | \$456.08                       | \$1,361.77            | -\$176.96                                                                       | 12                                                            |
| 16. NICU Level 2 hospital ward duration                                                                                                           | All Provinces    | \$943.82                            | \$2,793.74            | \$2,661.05                     | \$7,250.08            | -\$1,717.22                                                                     | <b>5 (Ontario),<br/>5 (British Columbia),<br/>5 (Alberta)</b> |
| 17. NICU Level 3 hospital ward duration                                                                                                           | All Provinces    | \$2,791.52                          | \$8,575.22            | \$4,694.89                     | \$14,398.47           | -\$1,903.36                                                                     | <b>3 (Ontario),<br/>3 (British Columbia),<br/>3 (Alberta)</b> |
| Medtronic Pumps and Number of Medtronic CGM Devices Used                                                                                          | All Provinces    | \$294.00                            | \$347.23              | \$0.00                         | \$0.00                | \$294.00                                                                        | 10 (Ontario),<br>10 (British Columbia),<br>10 (Alberta)       |
| CGMs Devices Used for Guardian Pumps or Multiple Dose Injections                                                                                  | All Provinces    | \$1,160.00                          | \$992.09              | \$0.00                         | \$0.00                | \$1,160.00                                                                      | 7 (Ontario),<br>7 (British Columbia),<br>7 (Alberta)          |

Appendix 7, as supplied by the authors. Appendix to: Ahmed RJ, Gafni A, Hutton EK, et al. The cost implications of continuous glucose monitoring in pregnant women with type 1 diabetes in 3 Canadian provinces: a posthoc cost analysis of the CONCEPTT trial. *CMAJ Open* 2021. DOI:10.9778/cmajo.20200128. Copyright © 2021 The Author(s) or their employer(s). To receive this resource in an accessible format, please contact us at [cmajgroup@cmaj.ca](mailto:cmajgroup@cmaj.ca).

## CONCEPTT Cost Implications

| Service                                                           | Province      | CGM Group<br>N=100<br>Women/Infants |                       | SMBG<br>N=102<br>Women/Infants |                       | Difference<br>Between<br>CGM and<br>SMBG<br>Mean<br>Total<br>Costs <sup>1</sup> | Rank of Cost<br>Driver<br>Within<br>Province <sup>2</sup>     |
|-------------------------------------------------------------------|---------------|-------------------------------------|-----------------------|--------------------------------|-----------------------|---------------------------------------------------------------------------------|---------------------------------------------------------------|
|                                                                   |               | Mean<br>Cost Per<br>Group           | Standard<br>Deviation | Mean<br>Cost Per<br>Group      | Standard<br>Deviation |                                                                                 |                                                               |
| CGM Devices for All Pump Types and Multiple Injection Users       | All Provinces | \$1,454.00                          | \$644.86              | \$0.00                         | \$0.00                | \$1,454.00                                                                      | 6 (Ontario),<br>6 (British Columbia),<br>6 (Alberta)          |
| CGM Sensors For All Pump Types and Multiple Daily Injection Users | All Provinces | \$1,880.40                          | \$174.61              | \$0.00                         | \$0.00                | \$1,880.40                                                                      | <b>4 (Ontario),<br/>4 (British Columbia),<br/>4 (Alberta)</b> |
| Glucometers For Both CGM and SMBG Patients                        | All Provinces | \$45.00                             | \$0.00                | \$45.00                        | \$0.00                | \$0.00                                                                          | 31 (Ontario),<br>31 (British Columbia),<br>31 (Alberta)       |
| Glucose Testing Strips For Both CGM and SMBG Patients             | All Provinces | \$1,231.36                          | \$113.50              | \$1,189.44                     | \$133.62              | \$41.91                                                                         | 20 (Ontario),<br>20 (British Columbia),<br>20 (Alberta)       |
| All CGM Devices and Sensors                                       | All Provinces | \$3,334.40                          | \$635.79              | 0                              | -                     | \$3,334.40                                                                      | <b>2 (Ontario),<br/>2 (British Columbia),<br/>2 (Alberta)</b> |
| All Glucometers and Glucose Testing Strips                        | All Provinces | \$1,276.36                          | \$113.50              | \$1,234.44                     | \$133.62              | \$41.91                                                                         | 21 (Ontario),<br>21 (British Columbia),<br>21 (Alberta)       |
| Total Cost of CGM devices, sensors, SMBG devices, and strips      | All Provinces | \$4,610.76                          | \$656.47              | \$1,234.44                     | \$133.62              | \$3,376.31                                                                      | <b>1 (Ontario),<br/>1 (British Columbia),<br/>1 (Alberta)</b> |

Notes: The group mean cost here represents the total cost incurred for each service or ward divided by the total number of women/infants in each study group, 100 or 102, whether or not they incurred the service or ward based on intention-to-treat principle, yielding a group mean cost per study group.

1. The difference between mean costs per group determines which group is more costly: a negative value favors the less costly CGM study group.
2. The absolute difference between CGM and SMBG group mean costs was ranked from 1=highest to 31=lowest mean cost difference, to determine which costs contribute the most difference between study groups
